# Supplementary material for: Architecture of the human G-protein-methylmalonyl-CoA mutase nanoassembly for B12 delivery and repair
Source: PubMed Central journal article supplement (PMC10356863; doi:10.1038/s41467-023-40077-4), 2023-07-19
Supplement: 41467_2023_40077_MOESM1_ESM.pdf [file 41467_2023_40077_MOESM1_ESM.pdf]

## Supporting Information

### **Architecture of the human G-protein-methylmalonyl-CoA mutase nanoassembly for B<sub>12</sub> delivery and repair**

Romila Mascarenhas<sup>1#</sup>, Markus Ruetz<sup>1#</sup>, Harsha Gouda<sup>1</sup>, Natalie Heitman<sup>1</sup>, Madeline Yaw<sup>1</sup> and  
Ruma Banerjee<sup>1</sup>

<sup>1</sup>Department of Biological Chemistry, University of Michigan, Ann Arbor, MI 48109

\*Address correspondence to: Ruma Banerjee, E-mail: rbanerje@umich.edu

**Supplementary Table 1.** Crystallographic data for the human M<sub>2</sub>C<sub>2</sub> complex

|                                           | MMUT•MMAA•GDP•CoA         |
|-------------------------------------------|---------------------------|
| Beamline                                  | APS, GMCA-B               |
| Wavelength (Å)                            | 1.033                     |
| Temperature (K)                           | 100                       |
| Space group                               | P 1 21 1                  |
| Cell dimension                            |                           |
| $\alpha, \beta, \gamma$ (°)               | 90, 105.5, 90             |
| a, b, c (Å)                               | 95.8, 221.8 121.8         |
| Resolution (Å)                            | 117.3-2.79<br>(3.07-2.79) |
| $R_{\text{merge}}$ (%)                    | 13.7 (77)                 |
| $R_{\text{meas}}$ (%)                     | 16.6(92)                  |
| $R_{\text{pim}}$ (%)                      | 9.2 (50)                  |
| $\langle I/\sigma \rangle$                | 5.2 (1.6)                 |
| CC (½)                                    | 1.0 (0.73)                |
| Completeness (%) (spherical)              | 61.9(9.1)                 |
| Completeness (%) (ellipsoidal)            | 89.3(63.9)                |
| Multiplicity                              | 3.1 (3.1)                 |
| No. Reflections                           | 234358(8485)              |
| No. Unique Reflections                    | 7483 (2737)               |
| Overall B (Å <sup>2</sup> ) (Wilson plot) | 71.9                      |
| Resolution Range                          | 80.6-2.79<br>(2.83-2.79)  |
| Number of reflections (work/test)         | 74782/3731                |
| $R_{\text{work}}/R_{\text{free}}$ (%)     | 0.23/0.27                 |
| No. of atoms                              |                           |
| protein                                   | 30,235                    |
| water                                     | 14                        |
| Ligand: CoA                               | 192                       |
| GDP                                       | 112                       |
| B-factors(Å <sup>2</sup> )                |                           |
| protein                                   | 63.82                     |
| water                                     | 48.57                     |
| Ligand: CoA                               | 51.9                      |
| GDP                                       | 53.2                      |
| Rmsd deviations                           |                           |
| Bond lengths (Å)                          | 0.004                     |
| Bond angles (°)                           | 0.633                     |
| Ramachandran plot (%)                     |                           |
| Favored, allowed, outliers                | 96.04, 3.96, 0            |
| MolProbity score                          | 2.05                      |
| PDB code                                  | 8GJU                      |

**Supplementary Table 2:** Summary of the biochemical penalties associated with MMUT and MMAA variants<sup>1</sup>

|                | GTPase activity (min <sup>-1</sup> ) | Intrinsic GTPase activity (min <sup>-1</sup> ) | Fold change | Activity (μmoles min <sup>-1</sup> mg <sup>-1</sup> ) | AdoCbl transferred | Cob(II)alamin transferred |
|----------------|--------------------------------------|------------------------------------------------|-------------|-------------------------------------------------------|--------------------|---------------------------|
| wild type MMUT | 2.1 ± 0.2 (n = 3)                    | N/A                                            | 36          | 89 ± 6 (n = 3)                                        | blocked            | complete                  |
| R228Q          | 0.7 ± 0.1 (n = 4)                    | N/A                                            | 12          | ND (n = 3)                                            | partial            | complete                  |
| R616C          | 0.4 ± 0.1 (n = 3)                    | N/A                                            | 7           | 71 ± 5 (n = 3)                                        | complete           | blocked                   |
| R694W          | 0.7 ± 0.3 (n = 3)                    | N/A                                            | 12          | 73 ± 1 (n = 3)                                        | blocked            | partial                   |
| R228Q/R616C    | ND (n = 3)                           | N/A                                            | ND          | ND (n = 3)                                            | complete           | partial                   |
| R98G MMAA      | 0.08 ± 0.05 (n = 4)                  | 0.05 ± 0.03 (n = 6)                            | 2           | N/A                                                   | complete           | blocked                   |
| R209S MMAA     | 0.03 ± 0.01 (n = 4)                  | 0.03 ± 0.02 (n=6)                              | 1           | N/A                                                   | complete           | blocked                   |

<sup>1</sup>The GTPase activity of MMAA in the presence of stoichiometric MMUT was measured. The fold change was calculated by dividing the GTPase activity in the presence of MMUT by the intrinsic GTPase activity of wild-type MMAA (0.06 ± 0.02 (n = 8)) or the MMAA variants in the absence of MMUT. n = number of repeats, ND = not detected, N/A = not applicable.

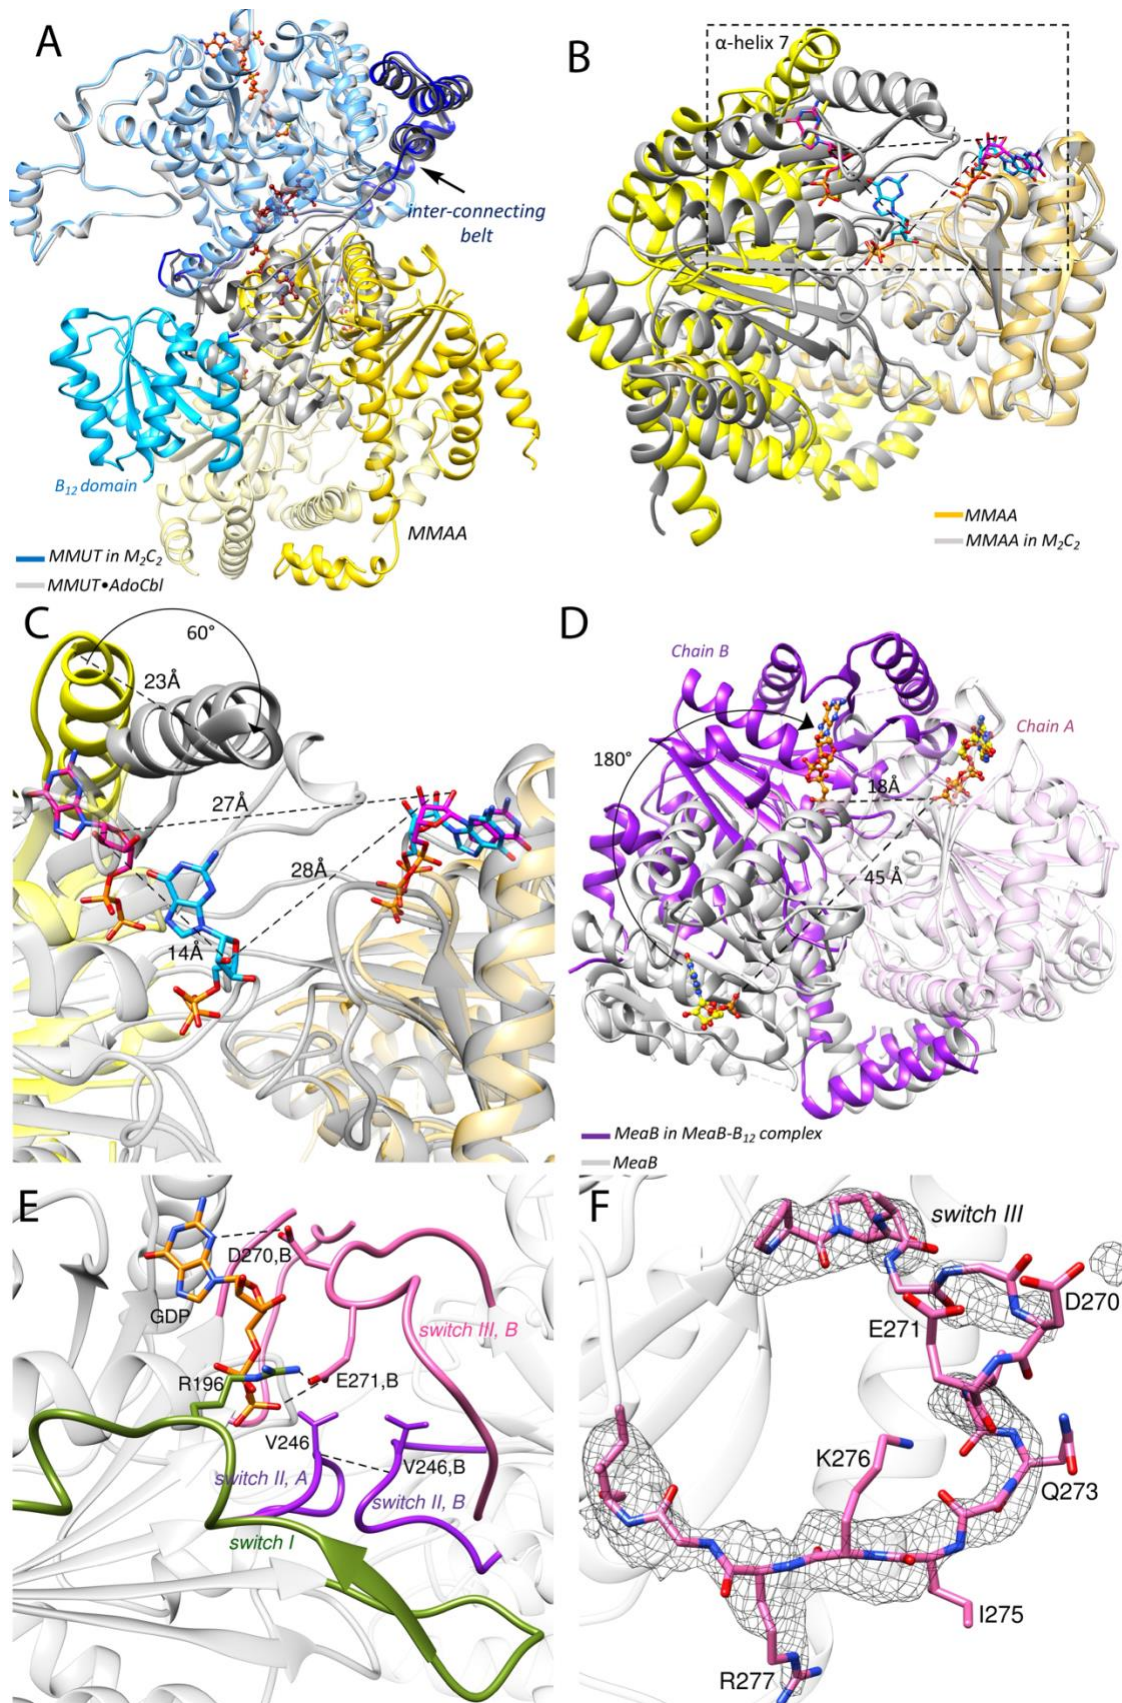

**Supplementary Figure 1. A.** Overlay of MMUT in  $M_2C_2$  (blue ribbon) and MMUT·AdoCbl-malonyl-CoA (PDB: 2XIQ) shows the  $B_{12}$  domain becomes solvent exposed in  $M_2C_2$  (cyan). MMAA (yellow ribbons) wedges between the  $B_{12}$  and substrate domains, forming new protein-protein interfaces. AdoCbl (red) and CoA (orange) are shown in stick display. **B.** Overlay of MMAA in the  $M_2C_2$  complex (grey) with free MMAA (PDB: 2WWW) (yellow). **C.** A close-up of the boxed area in B shows that one subunit rotates by  $\sim 60^\circ$  towards the dimer interface. GDP is shown in blue stick display in  $M_2C_2$  and in magenta in free MMAA. **D.** Overlay of free MeaB (PDB:2QM7, grey ribbon) and MeaB in complex with the MutAB  $B_{12}$  domain (PDB:8DPB). The purple ribbon shows that chain B undergoes a  $180^\circ$  rotation upon complex formation. GDP in MeaB is shown as yellow sticks and GMPPCP in the MeaB- $B_{12}$  domain is shown in orange. **E.** A close-up of the MMAA dimer interface shows that switch I (green), switch II (purple) and switch III from chain B (pink) are engaged in GDP (orange sticks) binding in the  $M_2C_2$  complex. **F.** A 2mFo-DFc composite omit map at  $1.5 \sigma$  of the switch III loop is shown in grey mesh. The backbone and side chains atoms of residues in the switch III loop are shown in pink stick display.

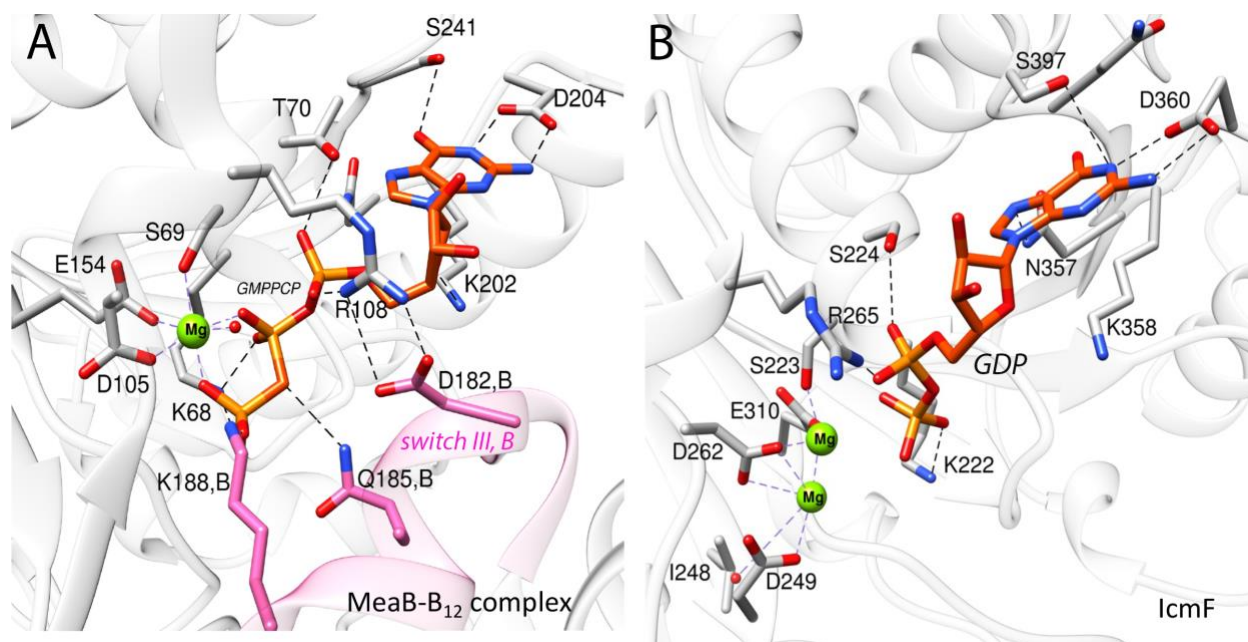

**Supplementary Figure 2. A.** Nucleotide binding site in the MeaB-MutAB B<sub>12</sub> domain complex. Mg<sup>2+</sup> (green sphere) is coordinated by oxygens from the α- and β-phosphate groups in GMPPCP (orange sticks), the oxygens from the side chains of Ser-69, Glu-154, Asp-105, and a water molecule. Switch III residues (pink) Gln-185 and Lys-188 from chain B form hydrogen bonds with GMPPCP, and Asp-182 forms a salt bridge with Arg-108. The corresponding residues in human switch III are Asp-270, Gln-273 and Lys-276. **B** The nucleotide binding site in IcmF. GDP is shown in orange sticks. Two Mg<sup>2+</sup> ions (green spheres) are coordinated by Ser-223, Glu-310, Asp-262, and Asp-249.

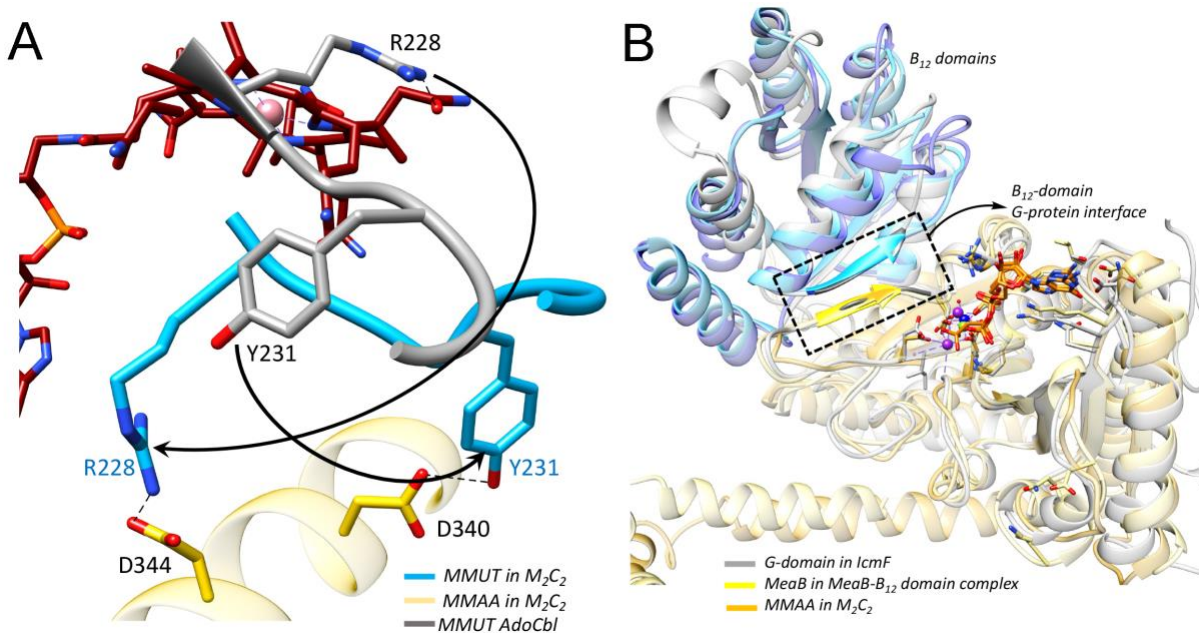

**Supplementary Figure 3. A.** Overlay of MMUT•AdoCbl (grey, PDB:2XIQ) and MMUT in the  $M_2C_2$  complex (blue) showing reorientation of a loop (227-234), which positions Arg-228 and Tyr-231 for interactions with Asp-344 and Asp-340 in MMAA. Cobalamin is shown as red sticks. **B.** Overlay of the  $B_{12}$ - (blue) and G- (yellow) domains in  $M_2C_2$  with the corresponding domain in lcmF (grey, PDB: 4XC8) and the MeaB-MutAB  $B_{12}$  domain complex (PDB:8DPB) reveals conservation in their juxtaposition. The boxed region highlights the  $\beta$ -sheet extension between switch I and the terminal  $\beta$ -sheet in the  $B_{12}$ -domain. GDP or GMPPCP is shown as orange sticks. Mg is shown as green, purple or dark blue spheres in MMAA, lcmF and MeaB, respectively.

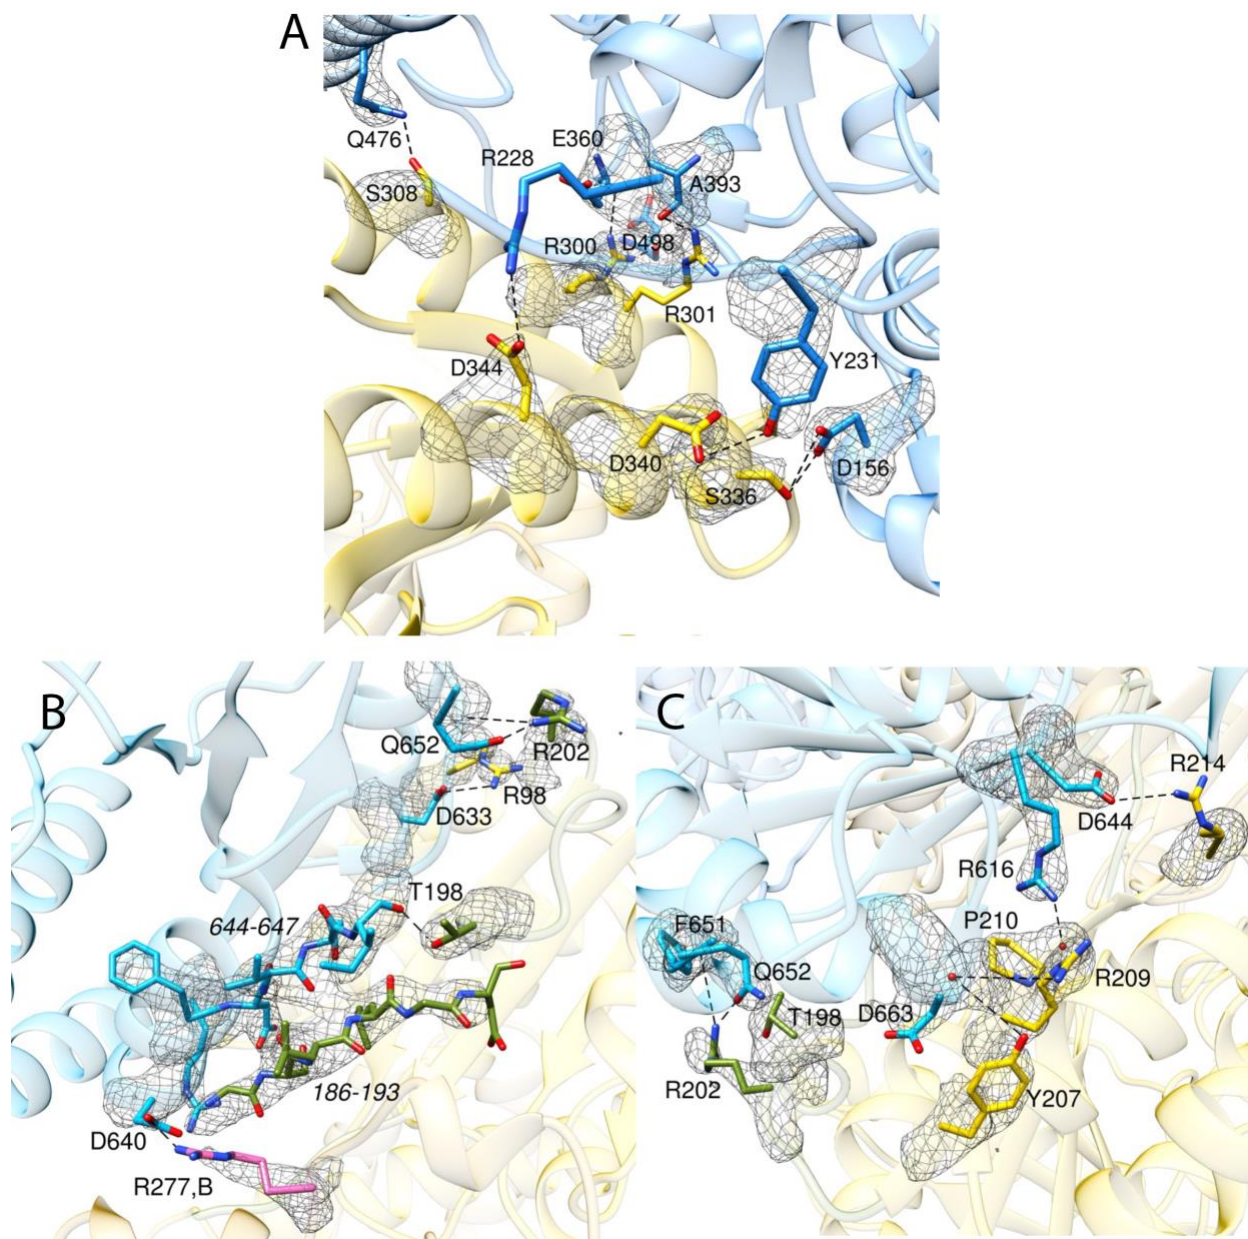

**Supplementary Figure 4.** **A** Residues interacting at the substrate domain (blue)-MMAA (yellow) interface are shown as sticks. 2mFo-DFc composite omit map of these residues is shown as a grey mesh at 1.5  $\sigma$ . **B.C.** Residues interacting at the B<sub>12</sub> domain (blue)-MMAA (yellow) interface and a 2mFo-DFc composite omit map of these residues is shown as a grey mesh at 1.5  $\sigma$ . Residues on the B<sub>12</sub>-domain and MMAA are shown as blue and yellow sticks, respectively, Switch I residues are shown as green sticks and Arg-277 from switch III is in pink.



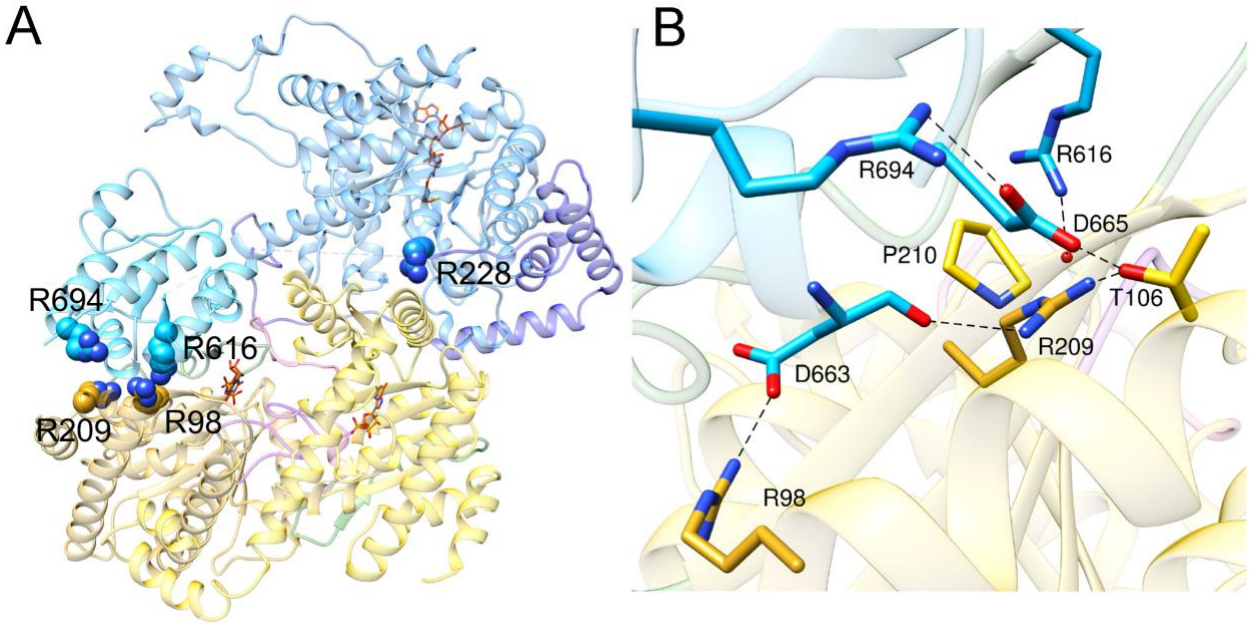

**Supplementary Figure 5.** Patient mutations at the MMUT•MMAA interfaces. **A.** Arg-228 resides at the substrate domain-MMAA interface while Arg-616 and Arg-694 in the B<sub>12</sub>-domain are involved in a different interface with the second subunit of MMAA. Arg-98 and Arg-209 from MMAA also reside at the B<sub>12</sub>-domain-MMAA interface. **B.** Close-up of the B<sub>12</sub> domain-MMAA interface showing interactions between Arg-616 and the backbone of Pro-210. The sidechain of Asp-665 bridges Arg-694 to MMAA via a salt bridge with Arg-694 and a hydrogen bond to Thr-106. Arg-209 and Arg-98 form hydrogen bonds with the backbone and sidechain of Asp-663.

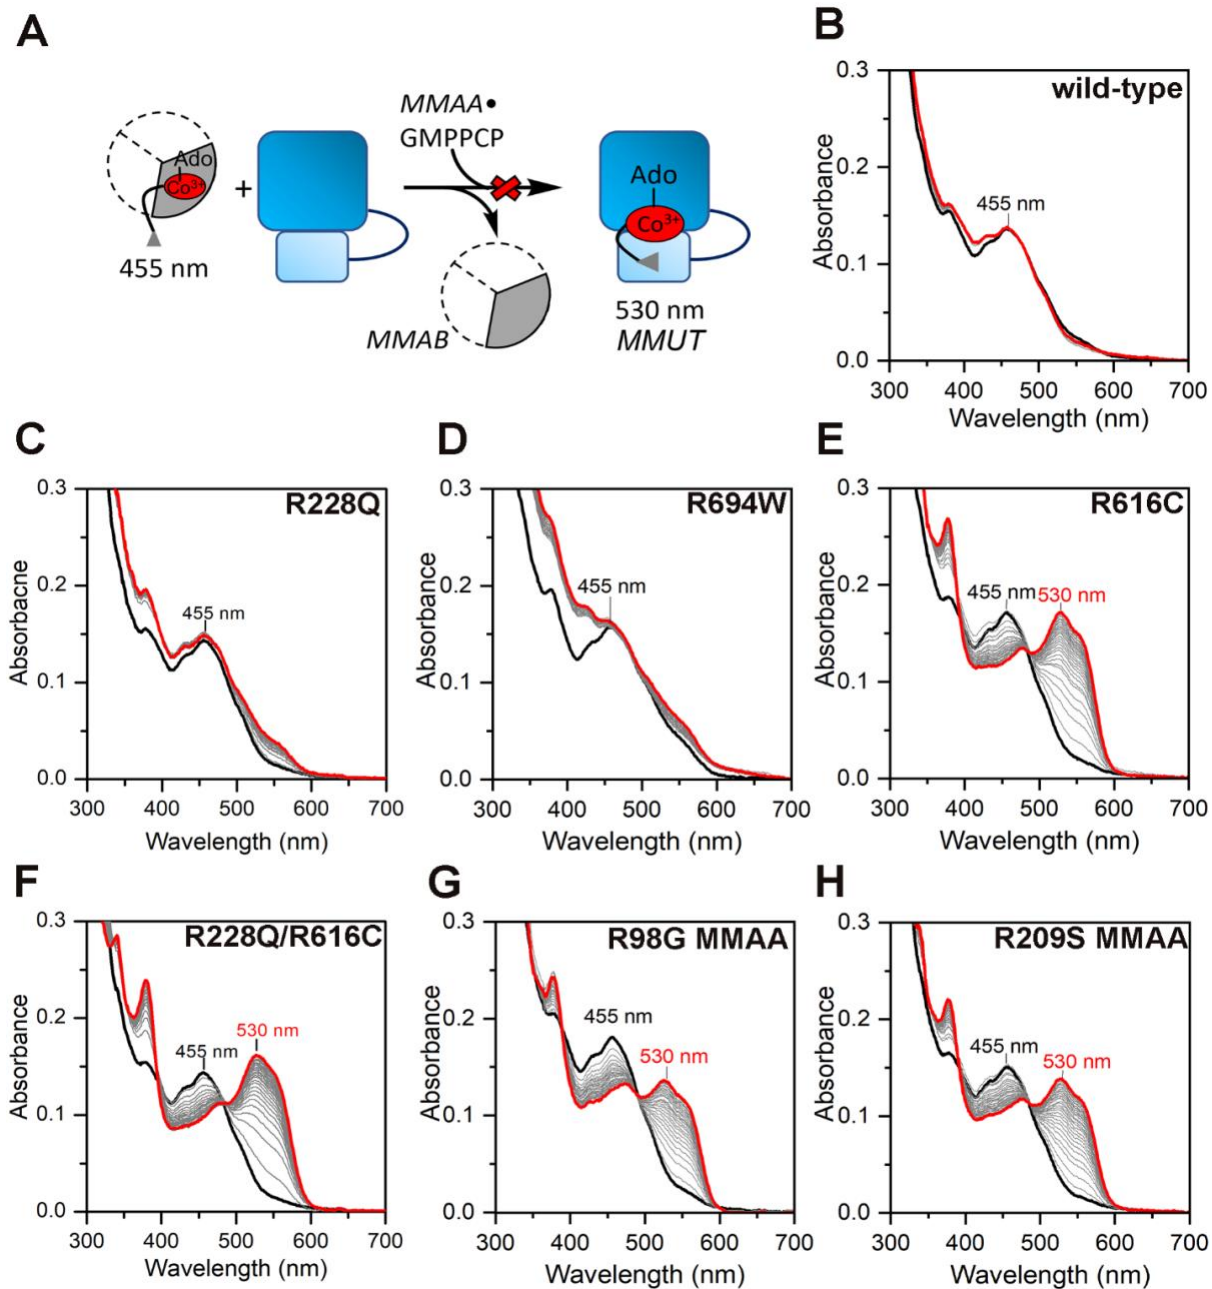

**Supplementary Figure 6. AdoCbl transfer from MMAB to MMUT in the presence of MMAA•GMPPCP.** (A) Scheme showing the gated transfer of AdoCbl from MMAB to MMUT, which does not occur when the non-hydrolysable GTP analogue GMPPCP is bound to MMAA. When mutations disrupt  $M_2C_2$  complex formation, AdoCbl transfer from MMAB to MMUT is accompanied by a spectroscopic shift from 455 nm (MMAB•AdoCbl) to 530 nm (MMUT•AdoCbl). (B -H) Transfer of AdoCbl (15  $\mu$ M) bound to MMAB (15  $\mu$ M) in Buffer A following addition of wild-type or mutant MMUT (15  $\mu$ M), wild-type or mutant MMAA (30  $\mu$ M) and GMPPCP (1 mM). UV/visible spectra were recorded every minute for 30 min. The initial and final spectra are shown in black and red respectively. (B) wild-type MMUT, (C) R228Q MMUT, (D) R694W MMUT (E) R616C MMUT (F) R228Q/R616C MMUT, (G) R98G MMAA, and (H) R209S MMAA. The spectra are representative of three independent experiments.

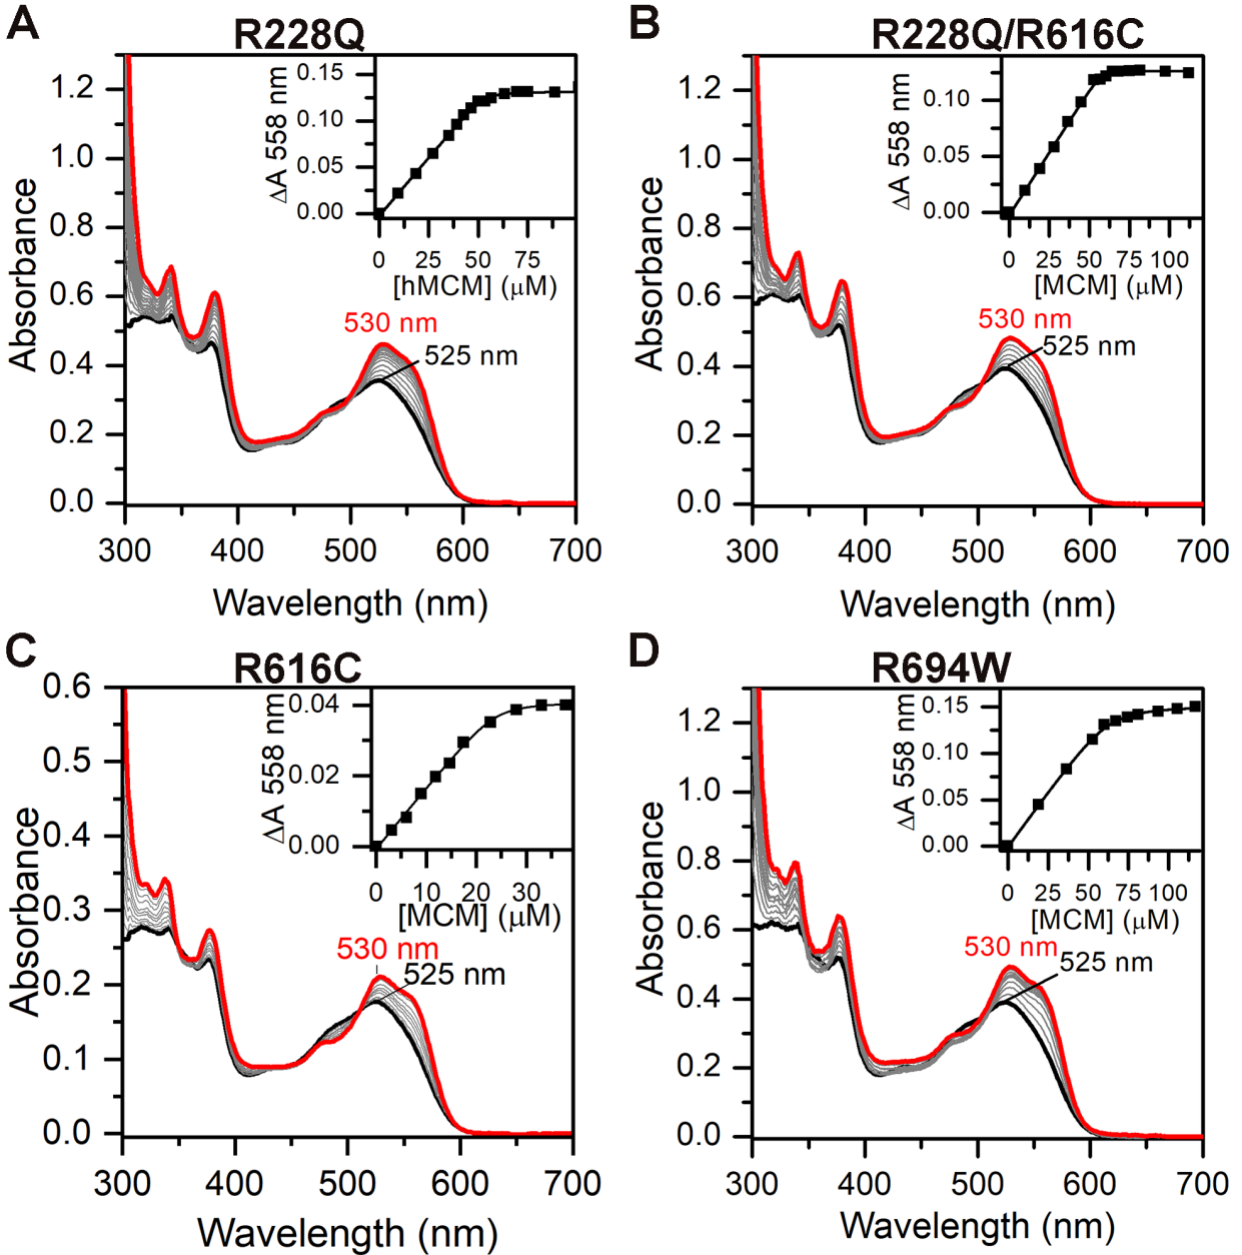

**Supplementary Figure 7. Determination of dissociation constants for binding of free AdoCbl to MMUT.** Varying concentrations of the MMUT variants were titrated into a solution of AdoCbl (50  $\mu\text{M}$ ) in Buffer A at 25  $^{\circ}\text{C}$ . **(A)** R228Q MMUT, **(B)** R228Q/R616C MMUT, **(C)** R616C MMUT, and **(D)** R694W MMUT. *Insets.* Dependence of  $A_{558 \text{ nm}}$  on MCM concentration. The data are representative of three independent experiments. Fitting of the binding isotherms in the insets to a single site binding model yielded the following  $K_{\text{D(AdoCbl)}}$  values: wild type, R228W and R228W/R6161C =  $<0.2 \mu\text{M}$ , R6161C =  $0.5 \pm 0.2 \mu\text{M}$ , and R694W ( $1.1 \pm 0.1 \mu\text{M}$ ).

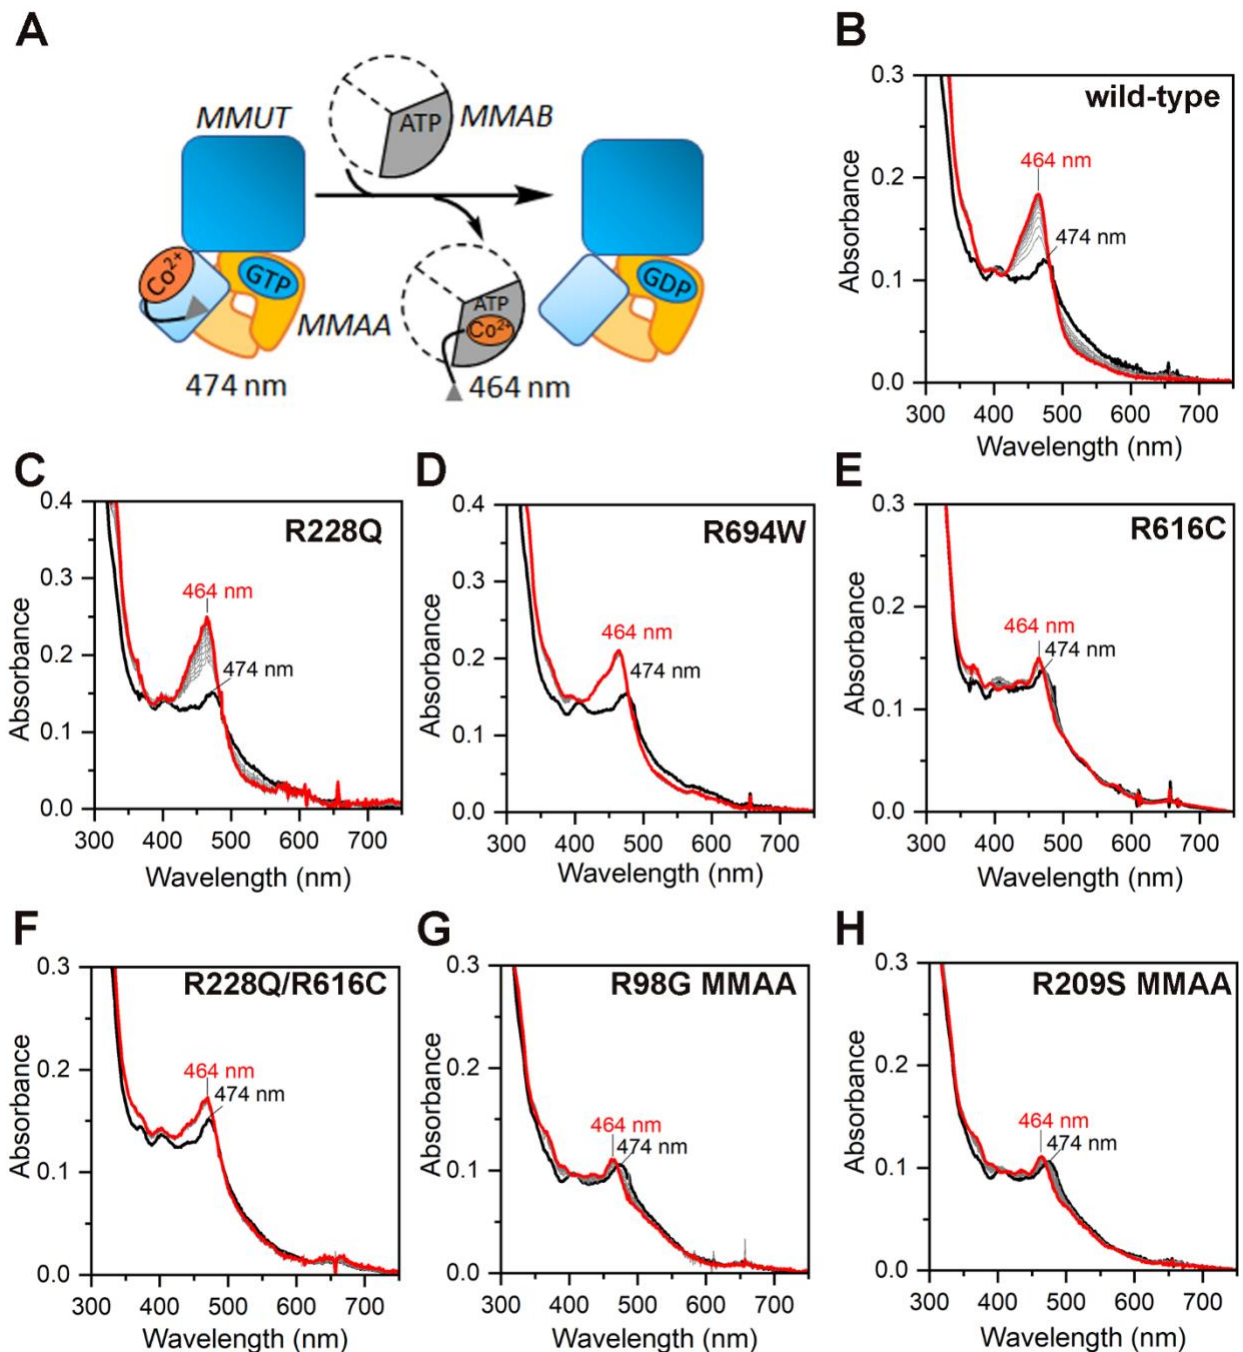

**Supplementary Figure 8. Cob(II)alamin transfer from MMUT to MMAB.** (A) Scheme showing the transfer of cob(II)alamin from MMUT to MMAB in the presence of MMAA•GTP. The blue shift from 474 nm to 464 nm with a concomitant increase in intensity is indicative of successful transfer. (B-H) Transfer of cob(II)alamin (15  $\mu$ M) bound to wild-type or mutant MMUT (10  $\mu$ M) in Buffer A following addition of MMAB (15  $\mu$ M), wild-type or mutant MMAA (30  $\mu$ M), 1 mM GTP and 5 mM ATP. UV/visible spectra were recorded every minute for 15 min; the initial and final spectra are shown in black and red, respectively. (B) Wild-type MMUT, (C) R228Q MMUT, (D) R694W MMUT, (E) R616C MMUT, (F) R228Q/R616C MMUT, (G) R98G MMAA, and (H) R209S MMAA. The spectra are representative of three independent experiments.

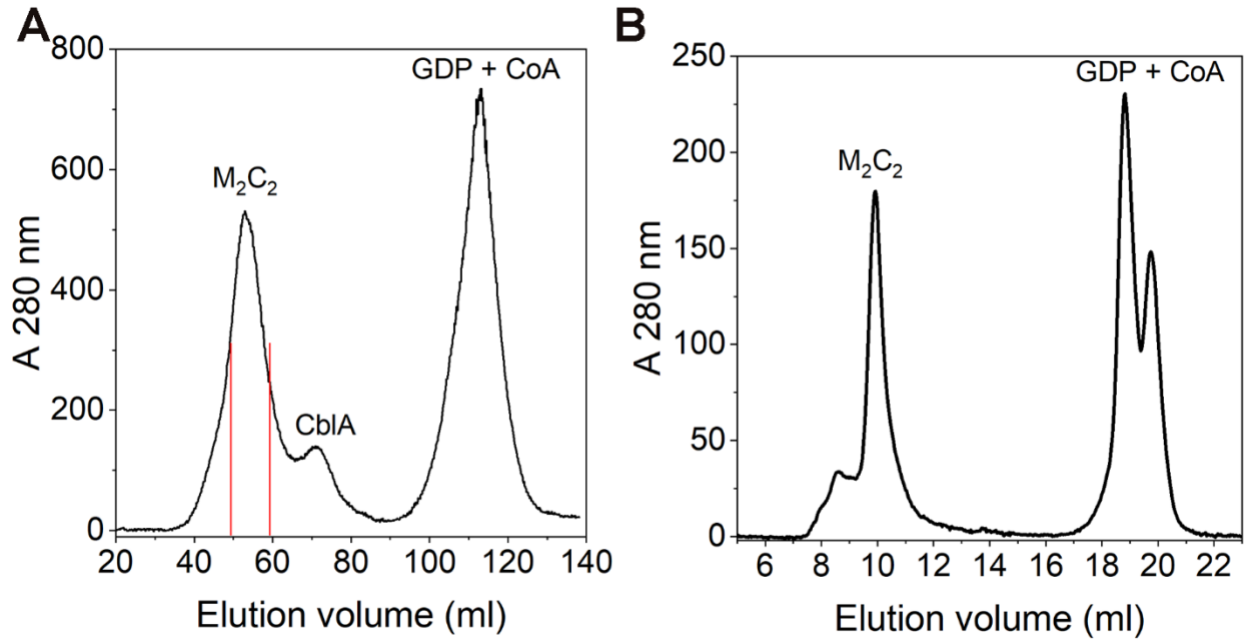

**Supplementary Figure 9. Purification of the human M<sub>2</sub>C<sub>2</sub> complex for crystallization. (A)** Gel filtration profile of 100  $\mu$ M MMUT, 200  $\mu$ M MMAA, 2 mM GDP and 2 mM CoA on an S300 column. The M<sub>2</sub>C<sub>2</sub> peak fractions (red bars) were used for crystallization. **(B).** The purified M<sub>2</sub>C<sub>2</sub> complex from **A** was reanalyzed on an analytical S200 column, which demonstrated that the complex was intact.
